# Supplementary material
Source: HighWire-hosted journal article supplement (http://www.ajnr.org/highwire/filestream/73601/field_highwire_adjunct_files/0/19-01082.pdf)
Supplement: 19-01082.pdf [file 19-01082.pdf]

**On-line Table: Summary of the 5 cases with biopsy-confirmed noninflammatory cerebral amyloid angiopathy**

| Case No. | Age (yr) | Clinical Presentation                   | Imaging Findings |        |                                                     |                         |                           | Interval from VWI to Biopsy | Biopsy Site |
|----------|----------|-----------------------------------------|------------------|--------|-----------------------------------------------------|-------------------------|---------------------------|-----------------------------|-------------|
|          |          |                                         | ICH              | MB No. | MB Location                                         | VWI CE                  | Other MR Imaging Findings |                             |             |
| 1        | 75       | Altered mental status, seizure          | Absent           | 8      | L temporal lobe                                     | L parietal and temporal | 1 day                     | L temporal                  |             |
| 2        | 75       | Headache                                | L parietal       | >50    | Bilateral parietal, temporal, and occipital regions | R parietal              | 2 days                    | L parietal                  |             |
| 3        | 79       | Altered mental status, headache         | L temporal       | 0      | Absent                                              | Absent                  | 10 days                   | L temporal                  |             |
| 4        | 74       | Headache, left-sided weakness, numbness | R parietal       | 3      | R frontal, L temporal                               | Absent                  | 7 hr                      | R parietal                  |             |
| 5        | 56       | Aphasia, right-sided weakness           | L frontal        | 0      | Absent                                              | Absent                  | 12 hr <sup>a</sup>        | L frontal                   |             |

**Note:**—ICH indicates intraparenchymal hemorrhage; MB, microbleed; VWI, vessel wall imaging; CE, contrast enhancement; ASL, arterial spin-labeling; R, right; L, left.

<sup>a</sup> In patient 5, MR imaging was performed 12 hours after the biopsy, and no interval changes were observed in the patient's clinical status. MR imaging was performed before the biopsy in patients 1–4.
